# Supplementary material for: Latin-American Registry of Cardiovascular Disease and COVID-19: Final Results
Source: bioRxiv or medRxiv preprint supplement (doi:10.1101/2023.03.15.23287304), 2023-03-15
Supplement: Supplementary file [file media-1.pdf]

## Supplementary material. Paraclinic test results

| Variable                                                 | Paraclinic test results        |      |                                |      |
|----------------------------------------------------------|--------------------------------|------|--------------------------------|------|
|                                                          | Paraclinics at admission n (%) | N    | Paraclinics at discharge n (%) | N    |
| Complete blood count                                     |                                | 3260 |                                | 3260 |
| 0. No                                                    | 22 (0.7)                       |      | 365 (11.2)                     |      |
| 1. Yes                                                   | 3238 (99.3)                    |      | 2895 (88.8)                    |      |
| Leukocytes_mm3<br>(median[IQR])                          | 8710.0 (6310.0, 12125.0)       | 3235 | 8640.0 (6207.5, 12500.0)       | 2888 |
| Lymphocytes_mm3<br>(median[IQR])                         | 1030.0 (700.0, 1480.0)         | 3166 | 1319.5 (800.0, 1970.0)         | 2838 |
| Hemoglobin_gr/dl<br>(median[IQR])                        | 13.6 (12.1, 14.9)              | 3196 | 12.1 (10.3, 13.7)              | 2855 |
| Hematocrit_% (median<br>percentage [IQR])                | 40.2 (36.1, 44.0)              | 3161 | 36.5 (31.3, 40.8)              | 2850 |
| Platelets_ul (median[IQR])                               | 228500.0 (176000.0, 297000.0)  | 3230 | 283000.0 (202000.0, 378000.0)  | 2890 |
| Prothrombin Time_seconds<br>(median[IQR])                | 13.2 (12.0, 14.6)              | 2540 | 13.2 (12.0, 15.1)              | 1503 |
| Partial Thromboplastin<br>Time_seconds (median[IQR])     | 31.8 (28.0, 36.8)              | 2352 | 34.0 (29.0, 42.0)              | 1310 |
| INR (median[IQR])                                        | 1.1 (1.0, 1.2)                 | 2408 | 1.1 (1.0, 1.3)                 | 1391 |
| Creatinine_mg/dl<br>(median[IQR])                        | 0.9 (0.7, 1.3)                 | 3193 | 0.9 (0.7, 1.3)                 | 2690 |
| Serum Sodium_mmol/l<br>(median[IQR])                     | 137.0 (134.0, 140.0)           | 2910 | 138.0 (136.0, 141.0)           | 2494 |
| Serum Potassium_mmol/l<br>(median[IQR])                  | 4.1 (3.8, 4.6)                 | 2906 | 4.2 (3.8, 4.7)                 | 2509 |
| Blood urea nitrogen_mg/dl<br>(median[IQR])               | 18.0 (12.5, 28.9)              | 2990 | 21.3 (14.3, 38.5)              | 2506 |
| Lactic dehydrogenase_U/l<br>(median[IQR])                | 369.0 (269.0, 515.2)           | 2704 | 293.0 (220.0, 440.8)           | 1806 |
| Aspartate Transaminase_u/l<br>(median[IQR])              | 42.0 (29.0, 65.8)              | 2659 | 36.1 (24.0, 61.0)              | 1630 |
| Alanine Aminotransferase_u/l<br>(median[IQR])            | 37.0 (24.0, 60.0)              | 2583 | 44.1 (27.0, 79.8)              | 1543 |
| Glucose_Glycemia_mg/dl<br>(median[IQR])                  | 125.0 (103.0, 175.0)           | 2301 | 119.0 (95.7, 158.0)            | 1671 |
| Arterial Blood Gas                                       |                                | 3260 |                                | 3260 |
| 0. No                                                    | 676 (20.7)                     |      | 1371 (42.1)                    |      |
| 1. Yes                                                   | 2584 (79.3)                    |      | 1889 (57.9)                    |      |
| PH (median[IQR])                                         | 7.4 (7.4, 7.5)                 | 2519 | 7.4 (7.4, 7.4)                 | 1873 |
| Oxygen Blood Pressure_mmHg<br>(median[IQR])              | 71.0 (58.7, 87.0)              | 2576 | 74.0 (62.0, 88.0)              | 1888 |
| Partial Pressure of Carbon<br>Dioxide_mmHg (median[IQR]) | 32.3 (28.4, 37.0)              | 2563 | 37.0 (33.0, 43.1)              | 1886 |
| Bicarbonate_HCO3_mmol/L<br>(median[IQR])                 | 21.7 (19.2, 24.0)              | 2477 | 23.5 (20.8, 26.2)              | 1853 |
| PCT Test                                                 |                                | 3260 |                                | 3260 |
| 0. No                                                    | 455 (14.0)                     |      | 1082 (33.2)                    |      |
| 1. Sensitive PCR                                         | 1739 (53.3)                    |      | 1416 (43.4)                    |      |
| 2. Ultrasensitive PCR                                    | 1066 (32.7)                    |      | 762 (23.4)                     |      |
| Troponin Test                                            |                                | 3260 |                                | 3260 |
| 0. No                                                    | 1174 (36.0)                    |      | 2365 (72.5)                    |      |
| 1. Troponin I                                            | 376 (11.5)                     |      | 99 (3.0)                       |      |

|                                                  |                       |      |                       |      |
|--------------------------------------------------|-----------------------|------|-----------------------|------|
| 2. Troponin T                                    | 143 (4.4)             |      | 54 (1.7)              |      |
| 3. Ultrasensitive Troponin I                     | 1216 (37.3)           |      | 489 (15.0)            |      |
| 4. Ultrasensitive Troponin T                     | 351 (10.8)            |      | 253 (7.8)             |      |
| Natriuretic Peptide Test                         |                       | 3260 |                       | 3260 |
| 0. No                                            | 2711 (83.2)           |      | 3026 (92.8)           |      |
| 1. BNP                                           | 94 (2.9)              |      | 50 (1.5)              |      |
| 2. NT-proBNP                                     | 455 (14.0)            |      | 184 (5.6)             |      |
| CPK_U/L (median[IQR])                            | 104.0 (53.0, 261.0)   | 1281 | 77.0 (34.7, 256.5)    | 683  |
| D-dimer_ug/mL (median[IQR])                      | 0.8 (0.4, 1.5)        | 2534 | 0.9 (0.4, 2.0)        | 1663 |
| Fibrinogen_mg/dL<br>(median[IQR])                | 550.0 (436.0, 663.0)  | 1244 | 457.5 (354.0, 574.8)  | 766  |
| Ferritin_ng/mL (median[IQR])                     | 820.0 (396.0, 1481.5) | 2347 | 759.5 (367.2, 1333.0) | 1502 |
| Sensitive PCR_mg/dl<br>(median[IQR])             | 10.1 (4.5, 20.0)      | 1734 | 2.5 (0.8, 7.9)        | 1415 |
| Ultrasensitive PCR_mg/dl<br>(median[IQR])        | 11.6 (4.5, 22.2)      | 1064 | 2.8 (0.8, 9.0)        | 760  |
| Troponin I_ng/mL<br>(median[IQR])                | 0.0 (0.0, 0.1)        | 375  | 0.1 (0.0, 0.3)        | 99   |
| Troponin T_ng/mL<br>(median[IQR])                | 0.0 (0.0, 0.1)        | 143  | 0.0 (0.0, 0.0)        | 54   |
| Ultrasensitive Troponin I_ng/mL<br>(median[IQR]) | 0.0 (0.0, 0.0)        | 1216 | 0.0 (0.0, 0.1)        | 489  |
| Ultrasensitive Troponin<br>T_ng/mL (median[IQR]) | 0.0 (0.0, 0.0)        | 351  | 0.0 (0.0, 0.1)        | 253  |
| BNP_pg/mL (median[IQR])                          | 100.2 (40.0, 432.2)   | 94   | 80.2 (33.0, 219.9)    | 50   |
| NT_proBNP_pg/mL<br>(median[IQR])                 | 429.0 (88.0, 2744.5)  | 455  | 427.5 (131.5, 2954.2) | 184  |
